# Supplementary material for: Anti-filarial antibodies are sensitive indicators of lymphatic filariasis transmission and enable identification of high-risk populations and hotspots
Source: PubMed Central journal article supplement (PMC11530377; doi:10.1016/j.ijid.2024.107194), 2024-10
Supplement: mmc5.pdf [file mmc5.pdf]

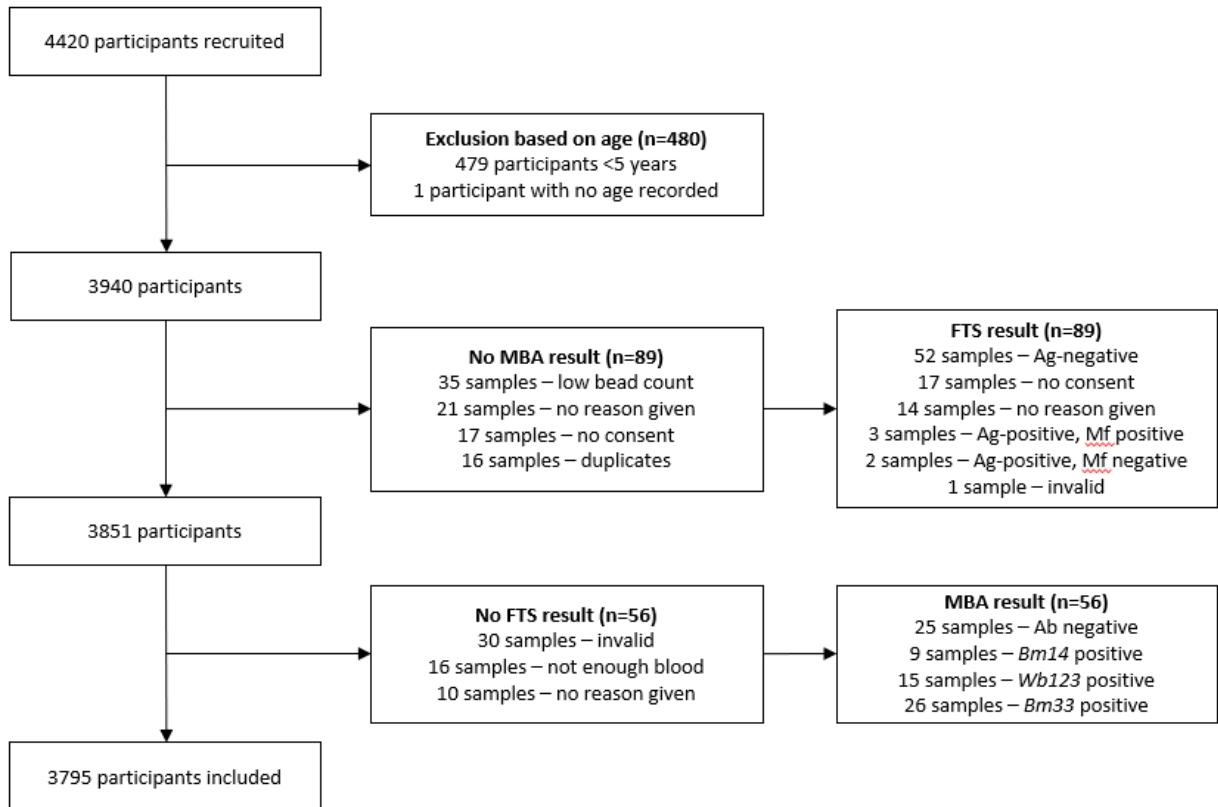

**Supplementary Figure 1: Flow chart of participant inclusion and exclusion, Samoa 2018**
