# Supplementary material for: Anti-filarial antibodies are sensitive indicators of lymphatic filariasis transmission and enable identification of high-risk populations and hotspots
Source: PubMed Central journal article supplement (PMC11530377; doi:10.1016/j.ijid.2024.107194), 2024-10
Supplement: mmc6.pdf [file mmc6.pdf]

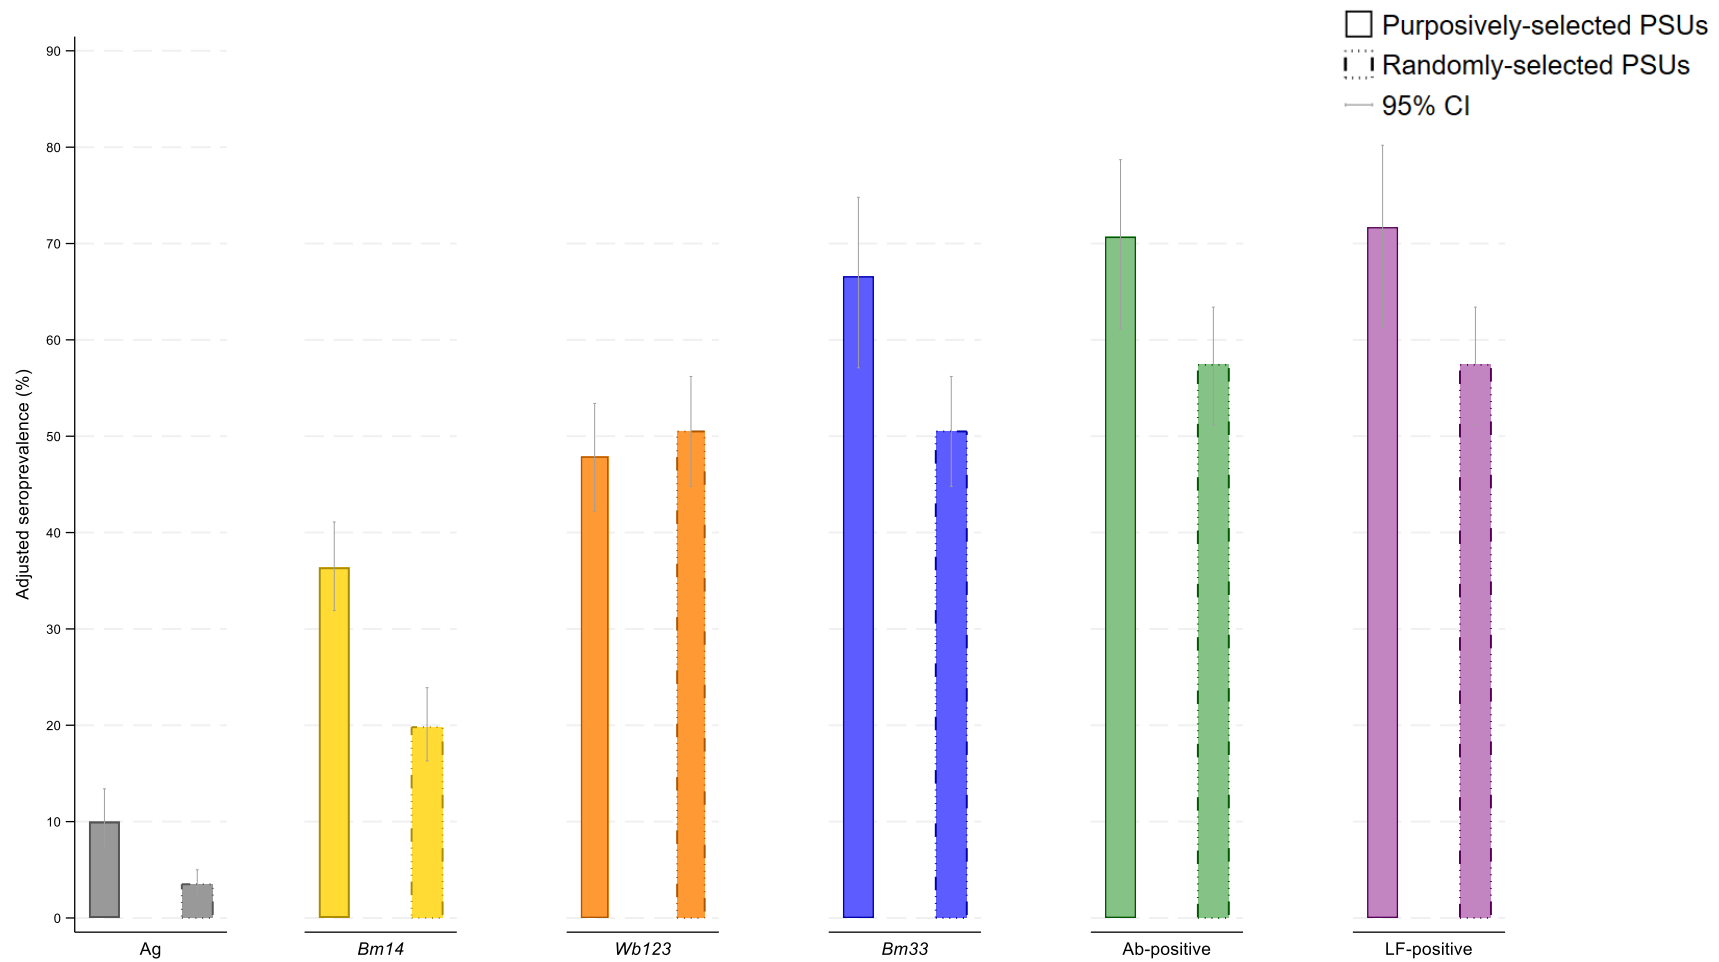

**Supplementary Figure 2: Antibody and antigen prevalence by all PSUs (adjusted for survey design) and purposively- or randomly selected PSUs (adjusted for survey design and standardised by age and sex), Samoa 2018.** Ab-positive indicates individuals testing seropositivity for at least one antibody. LF-positive indicates individuals testing seropositive for at least one LF marker (antibody and/or antigen)
