# Supplementary material for: Anti-filarial antibodies are sensitive indicators of lymphatic filariasis transmission and enable identification of high-risk populations and hotspots
Source: PubMed Central journal article supplement (PMC11530377; doi:10.1016/j.ijid.2024.107194), 2024-10
Supplement: mmc7.pdf [file mmc7.pdf]

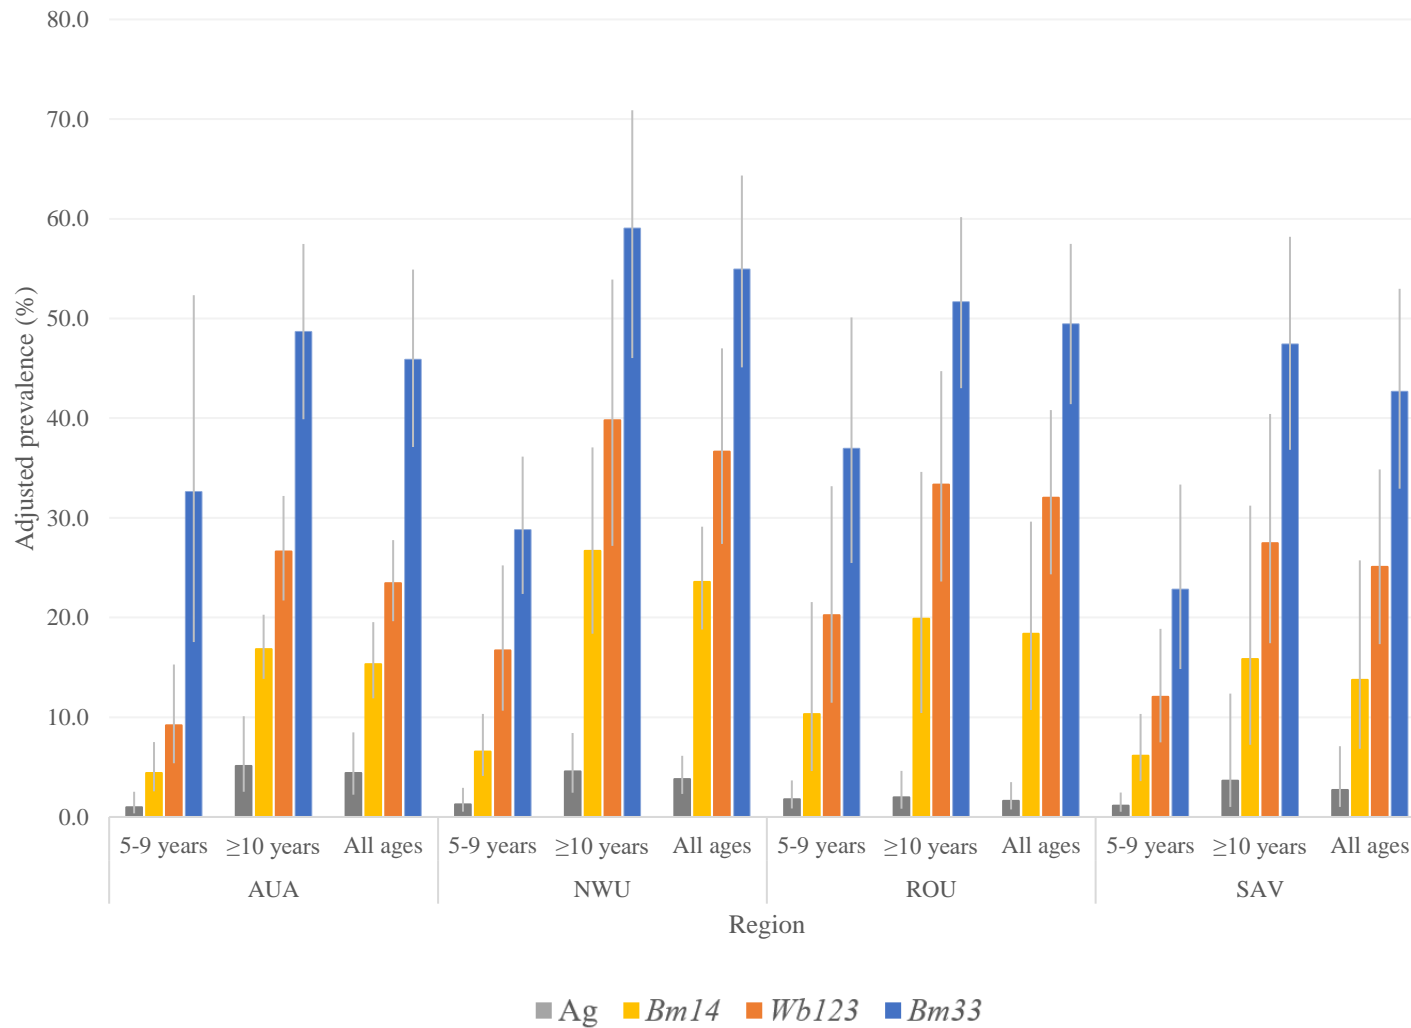

**Supplementary Figure 3: Adjusted Ag and Ab prevalence by region for participants aged  $\geq 5$  years, 5-9 years, and  $\geq 10$  years from randomly selected PSUs, Samoa 2018.** AUA (Apia Urban area) NWU (Northwest Upolu), ROU (Rest of Upolu), SAV (Savai'i)
