# Supplementary material for: Anti-filarial antibodies are sensitive indicators of lymphatic filariasis transmission and enable identification of high-risk populations and hotspots
Source: PubMed Central journal article supplement (PMC11530377; doi:10.1016/j.ijid.2024.107194), 2024-10
Supplement: mmc8.pdf [file mmc8.pdf]

|     | 5-9 years |      |       |      |             | >10 years |      |       |      |             | All participants |      |       |      |             |
|-----|-----------|------|-------|------|-------------|-----------|------|-------|------|-------------|------------------|------|-------|------|-------------|
|     | Ag        | Bm14 | Wb123 | Bm33 | LF positive | Ag        | Bm14 | Wb123 | Bm33 | LF positive | Ag               | Bm14 | Wb123 | Bm33 | LF positive |
| AUA | 0.0       | 4.5  | 2.0   | 16.7 | 23.2        | 0         | 14.7 | 20.5  | 41.0 | 46.6        | 0.0              | 11.0 | 17.5  | 40.0 | 45.6        |
|     | 0.0       | 0.0  | 7.5   | 18.8 | 20.7        | 5.2       | 15.7 | 20.0  | 42.9 | 47.2        | 2.4              | 7.6  | 11.7  | 34.0 | 36.2        |
|     | 0.0       | 4.3  | 4.4   | 32.8 | 35.0        | 0.0       | 7.3  | 27.9  | 50.2 | 55.9        | 0.0              | 12.2 | 27.7  | 46.5 | 50.5        |
|     | 2.0       | 8.2  | 8.2   | 20.4 | 20.4        | 8.1       | 15.7 | 20.2  | 37.2 | 41.3        | 5.6              | 13.7 | 15.3  | 32.2 | 34.8        |
|     | 1.9       | 6.6  | 14.5  | 55.2 | 57.5        | 8.8       | 20.1 | 31.4  | 58.6 | 64.4        | 7.7              | 19.3 | 27.8  | 55.1 | 60.1        |
|     | 0.0       | 0.0  | 10.2  | 13.8 | 20.2        | 5.5       | 22.7 | 36.7  | 43.9 | 56.5        | 5.4              | 16.6 | 32.5  | 36.6 | 46.5        |
|     | 1.6       | 3.1  | 12.5  | 31.8 | 34.9        | 4.1       | 22.4 | 34.1  | 71.9 | 77.9        | 2.0              | 15.4 | 33.1  | 67.9 | 73.7        |
| NWU | 0.0       | 8.0  | 8.0   | 14.0 | 21.9        | 2.1       | 21.1 | 36.8  | 40.1 | 49.0        | 1.3              | 14.8 | 29.1  | 42.8 | 50.0        |
|     | 0.0       | 2.0  | 12.4  | 21.4 | 32.4        | 1.7       | 24.3 | 37.2  | 56.2 | 62.9        | 1.5              | 20.7 | 32.2  | 49.2 | 57.6        |
|     | 0.0       | 8.2  | 15.8  | 27.4 | 35.5        | 2.2       | 14.3 | 34.0  | 48.6 | 57.6        | 0.9              | 16.1 | 33.7  | 45.1 | 54.0        |
|     | 0.0       | 1.4  | 7.0   | 22.2 | 23.7        | 0.0       | 10.4 | 12.9  | 40.0 | 49.3        | 0.0              | 9.5  | 9.5   | 37.4 | 45.6        |
|     | 1.9       | 30.1 | 35.8  | 64.1 | 67.9        | 12.4      | 56.7 | 65.3  | 80.5 | 91.0        | 7.9              | 44.5 | 58.4  | 74.9 | 84.9        |
|     | 1.6       | 8.3  | 11.8  | 38.9 | 45.6        | 9.0       | 36.1 | 45.3  | 72.6 | 77.5        | 8.5              | 30.6 | 39.9  | 65.0 | 70.8        |
|     | 0.0       | 3.8  | 15.3  | 19.1 | 26.6        | 0.0       | 21.1 | 30.6  | 49.8 | 51.5        | 0.0              | 16.6 | 27.1  | 44.5 | 46.4        |
|     | 1.7       | 5.4  | 23.4  | 38.3 | 45.2        | 6.2       | 25.9 | 48.8  | 55.0 | 58.7        | 5.7              | 19.5 | 41.6  | 53.0 | 56.3        |
|     | 9.9       | 17.3 | 32.5  | 55.6 | 58.0        | 10.6      | 46.0 | 64.6  | 86.9 | 90.6        | 9.4              | 41.8 | 63.0  | 83.7 | 86.7        |
|     | 1.8       | 6.7  | 29.3  | 29.7 | 42.5        | 8.7       | 40.8 | 58.5  | 78.2 | 89.5        | 4.5              | 28.8 | 46.5  | 74.5 | 83.1        |
|     | 2.1       | 4.2  | 14.2  | 44.7 | 49.0        | 9.0       | 37.8 | 42.0  | 72.9 | 79.4        | 9.3              | 32.1 | 38.0  | 64.5 | 71.2        |
|     | 3.8       | 15.5 | 20.5  | 41.9 | 45.7        | 10.8      | 35.4 | 46.6  | 68.2 | 75.3        | 12.3             | 35.1 | 47.2  | 67.1 | 75.0        |
|     | 2.3       | 4.2  | 18.8  | 56.7 | 58.6        | 18.7      | 50.3 | 64.1  | 77.8 | 81.3        | 20.0             | 42.6 | 56.7  | 75.5 | 78.1        |
|     | ROU       | 0.0  | 1.8   | 14.3 | 28.6        | 39.2      | 0.0  | 20.0  | 30.4 | 48.6        | 55.1             | 0.0  | 17.3  | 29.0 | 46.8        |
| 0.0 |           | 1.5  | 6.3   | 14.8 | 19.3        | 3.9       | 7.8  | 16.9  | 37.6 | 45.5        | 2.6              | 8.5  | 20.3  | 36.5 | 43.1        |
| 1.9 |           | 6.0  | 8.2   | 31.3 | 35.5        | 0.0       | 7.9  | 31.5  | 49.2 | 57.0        | 0.3              | 7.5  | 29.4  | 49.0 | 56.8        |
| 0.0 |           | 8.7  | 13.7  | 22.4 | 29.3        | 0.0       | 5.4  | 15.6  | 28.9 | 33.8        | 0.0              | 7.0  | 13.9  | 24.8 | 28.1        |
| 1.6 |           | 0.0  | 22.7  | 33.6 | 49.2        | 0.0       | 10.2 | 22.3  | 51.4 | 58.3        | 0.2              | 6.9  | 21.5  | 43.0 | 53.0        |
| 4.7 |           | 23.2 | 38.1  | 56.8 | 61.9        | 3.3       | 36.0 | 47.2  | 60.2 | 61.8        | 2.3              | 30.4 | 42.2  | 54.6 | 56.7        |
| 2.9 |           | 22.2 | 30.3  | 59.6 | 62.4        | 6.6       | 34.7 | 47.2  | 69.6 | 73.7        | 5.1              | 33.1 | 40.6  | 67.9 | 71.9        |
| 0.0 |           | 22.2 | 30.5  | 61.1 | 61.1        | 6.9       | 55.1 | 74.7  | 95.4 | 97.7        | 3.8              | 42.5 | 64.9  | 89.3 | 92.0        |
| SAV | 0.0       | 0.0  | 0.0   | 9.8  | 9.8         | 2.3       | 6.1  | 19.8  | 21.7 | 31.6        | 1.2              | 3.2  | 14.8  | 19.2 | 27.1        |
|     | 1.8       | 3.5  | 12.2  | 19.4 | 28.0        | 0.0       | 13.5 | 29.4  | 48.3 | 56.9        | 0.3              | 8.0  | 22.2  | 38.8 | 46.2        |
|     | 0.0       | 10.8 | 8.8   | 12.4 | 20.0        | 0.0       | 9.5  | 11.8  | 49.7 | 49.7        | 0.0              | 8.7  | 15.4  | 39.1 | 40.4        |
|     | 2.2       | 5.3  | 9.0   | 27.8 | 34.5        | 1.8       | 5.3  | 28.6  | 41.1 | 55.3        | 1.1              | 4.2  | 26.5  | 28.8 | 49.9        |
|     | 1.5       | 3.9  | 15.2  | 36.3 | 42.4        | 4.1       | 18.9 | 32.7  | 52.0 | 58.6        | 4.8              | 11.7 | 30.2  | 48.8 | 59.0        |
|     | 1.6       | 8.7  | 24.9  | 37.4 | 43.9        | 17.1      | 49.9 | 55.0  | 70.3 | 79.2        | 10.3             | 42.5 | 46.9  | 62.8 | 69.5        |
|     | 0.0       | 5.6  | 14.9  | 20.4 | 26.0        | 6.7       | 27.4 | 41.4  | 49.2 | 53.7        | 6.0              | 29.6 | 40.5  | 47.2 | 50.8        |

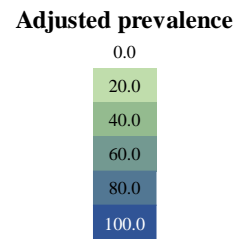

**Supplementary Figure 4: Adjusted antigen and antibody prevalence by PSU and region for participants aged 5-9 years,  $\geq 10$  years, and all study participants, Samoa 2018. Purposively selected PSUs are indicated by the purple borders. Colour spectrum from light to dark indicates progressive increase in prevalence. Light green denotes low prevalence, blue denotes high prevalence. AUA (Apia Urban area) NWU (Northwest Upolu), ROU (Rest of Upolu), SAV (Savai'i)**
